# Supplementary material for: Structural and Enzymatic characterization of the lactonase SisLac from Sulfolobus islandicus
Source: PLoS One. 2012 Oct 10;7(10):e47028. doi: 10.1371/journal.pone.0047028 (PMC3468530; doi:10.1371/journal.pone.0047028)
Supplement: Table S4 — Phosphotriesterase activity comparison between Gs P, Dr OPH and Sso Pox and Sis Lac. (DOC) [file pone.0047028.s011.doc]

**Table S4: Phosphotriesterase activity comparison between *Gs*P, *Dr*OPH and *Sis***Lac

| **Substrate** | | ***Sis*Lac** | | | ***Gs*Pa** | | | ***Dr*OPHb** | | |
| --- | --- | --- | --- | --- | --- | --- | --- | --- | --- | --- |
| **Name** | **Structure** | **kcat (s-1)** | **KM (µM)** | **kcat/KM (s-1M-1)** | **kcat (s-1)** | **KM (µM)** | **kcat/KM (s-1M-1)** | **kcat (s-1)** | **KM (µM)** | **kcat/KM (s-1M-1)** |
| **Ethyl-Paraoxon** | 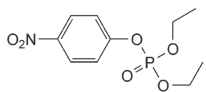 | 1.42 ± 0.09 | 5 439 ± 873 | 2.6(±0.58)x102 | 0.12 ± 0.02 | 2100 ± 320 | 5,47(±0.47)x101 | 4.16 (±0.13)x10-3 | 3 000 ± 200 | 1.39 ± 0.11 |
| **Methyl-Paraoxon** | 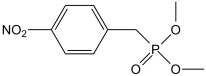 | 7.40 ± 1.26 | 1 739 ± 417 | 4.26(±1.74)x103 | 7.83(±0.33)x10-3 | 270 ± 31 | 2.90(±0.13)x101 | 7.67(±0.33)x10-4 | 1300 ± 100 | 0.58 ± 0.05 |

a from Hawwa *et al*. (2009), data characterized at 35 °C. b from Hawwa *et al*. (2009). Data obtained with cobalt as cofactor.
